# Supplementary material for: Smart Energy Planning in the Midst of a Technological and Political Change towards a 100% Renewable System in Mexico by 2050
Source: MDPI journal article supplement (doi:10.3390/en16207121), 2023-10-17
Supplement: s1 [file s1]

Archive with 1 entries (1 files):
- energies-2587339-supplementary.pdf
