# Supplementary material for: Smart Energy Planning in the Midst of a Technological and Political Change towards a 100% Renewable System in Mexico by 2050
Source: MDPI journal article supplement (doi:10.3390/en16207121), 2023-10-17
Supplement: s1 [file s1 › energies-2587339-supplementary.pdf]

## Complementary material

Below are the profiles of solar radiation, wind speed, energy demand, charging of electric vehicles referring to the base year in Mexico.

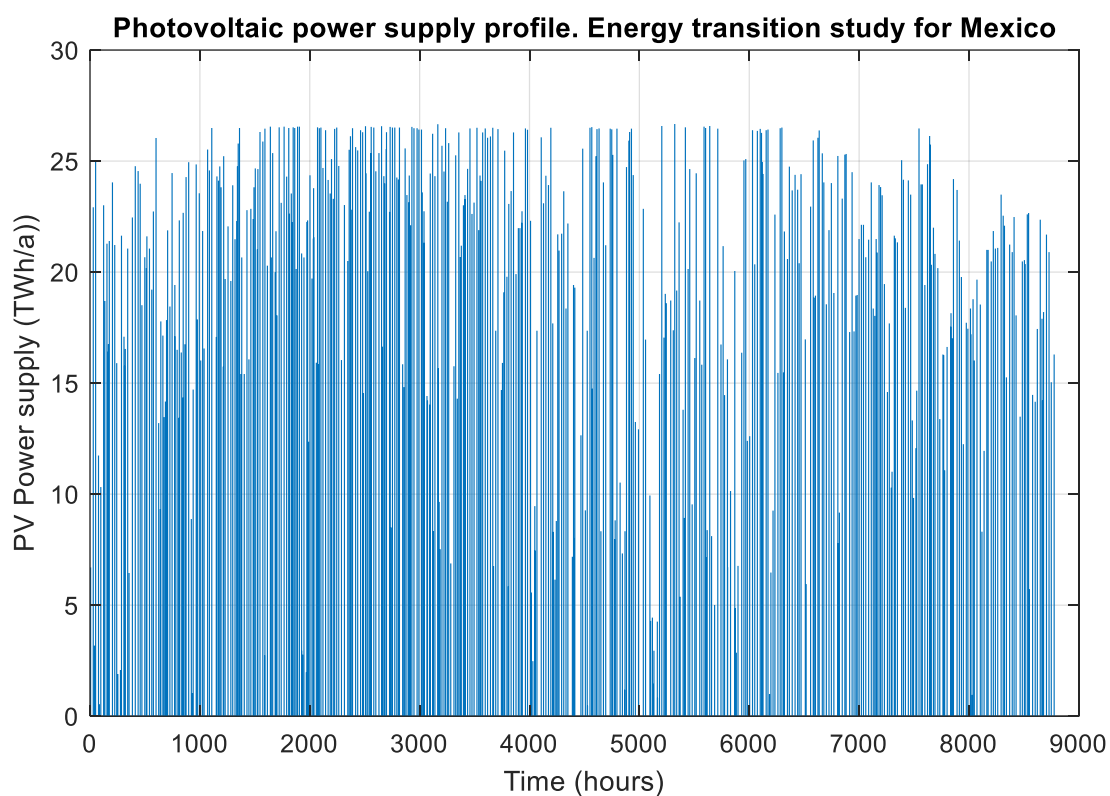

(a)

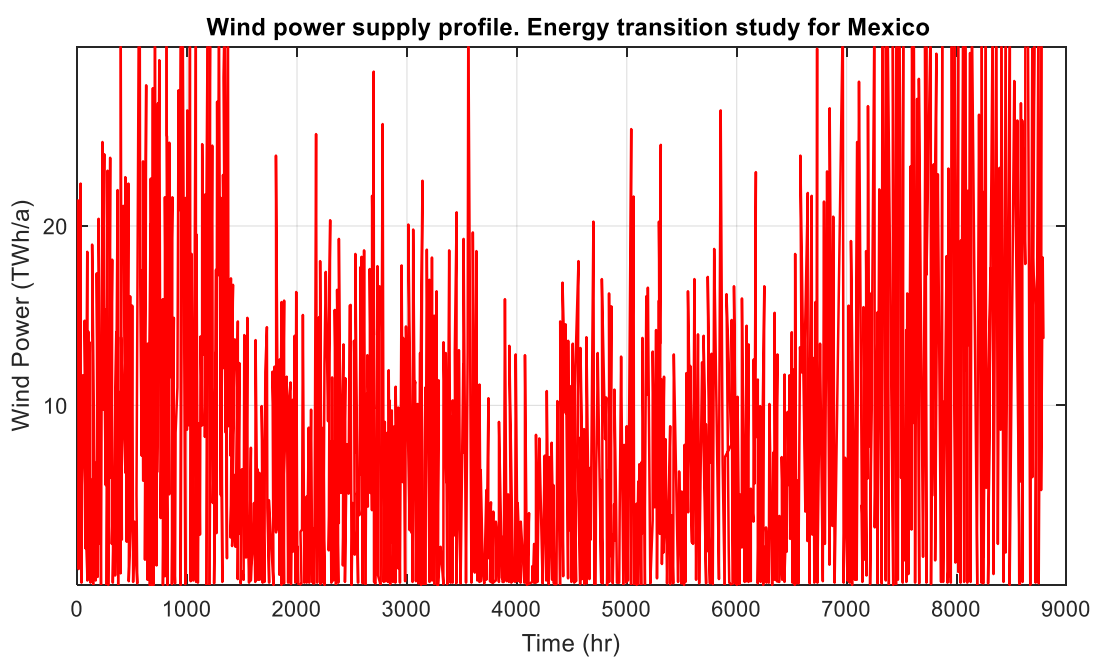

(b)

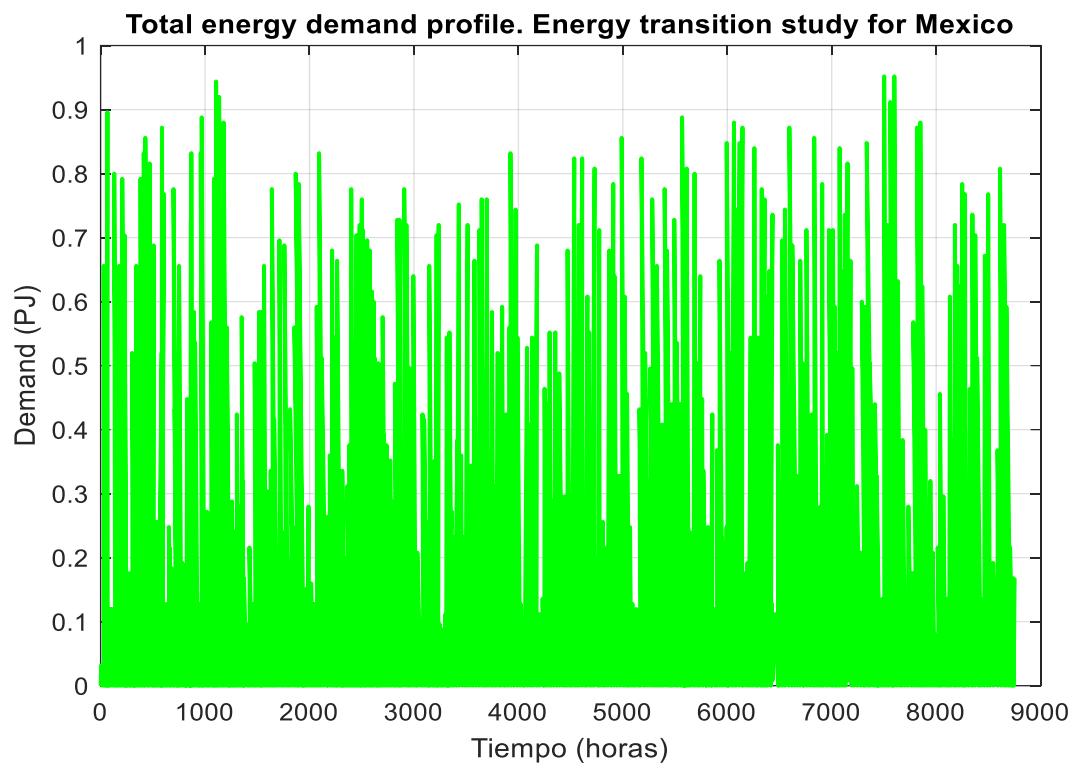

(c)

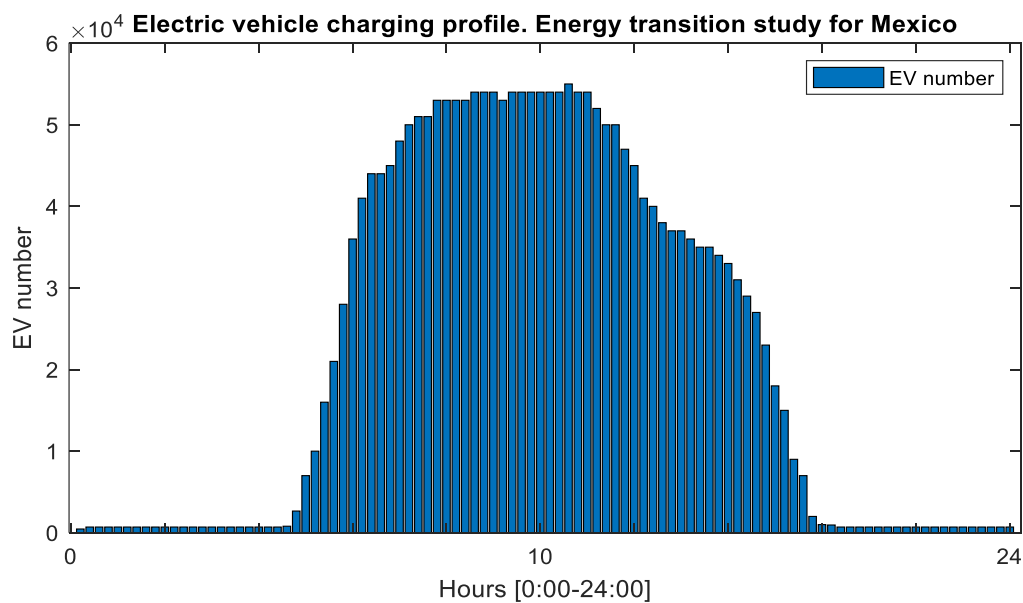

(d)

**Figure S1.** Profiles used in the Mexican analysis: (a) Supply of photovoltaic solar energy. (b) Wind power supply. (c) Power demand. (d) Charging electric vehicles.
